# Supplementary material for: Selective removal of lead ions from aqueous solutions using 1,8-dihydroxyanthraquinone (DHAQ) functionalized graphene oxide; isotherm, kinetic and thermodynamic studies
Source: Royal Society of Chemistry journal article supplement (doi:10.1039/c7ra13603j), 2018-01-01
Supplement: c7ra13603j1.pdf [file c7ra13603j1.pdf]

## Selective removal of lead ions from aqueous solutions using 1, 8-dihydroxyanthraquinon (DHAQ) functionalized graphene oxide; isotherm, kinetic and thermodynamic studies

Mohammad Khazaei

Department of Environmental Health Engineering, School of Public Health and Research Center for Health Sciences, Hamadan University of Medical Sciences, Hamadan, Iran

Department of Environmental Health Engineering, School of Public Health, Tehran University of Medical Sciences, Tehran, Iran.

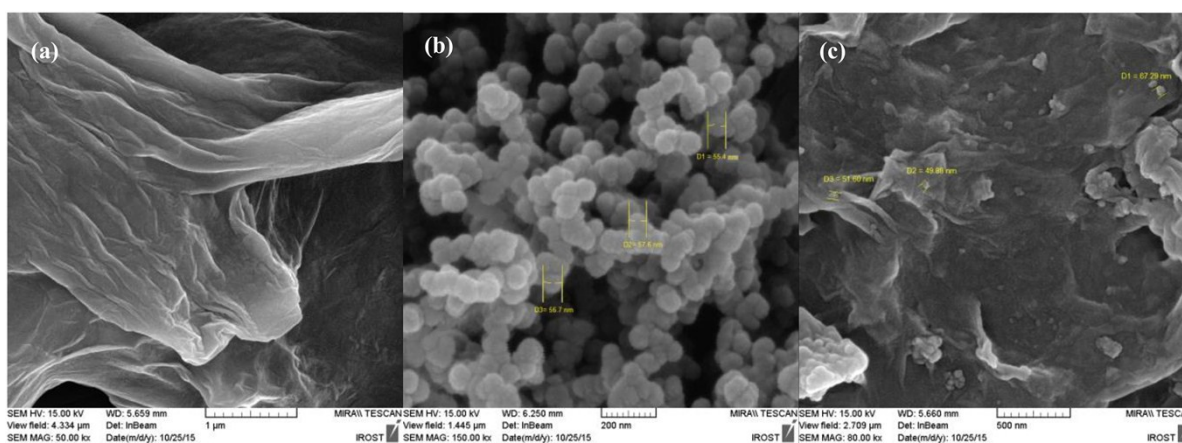

Figure S1. SEM images of GO (a), Fe<sub>3</sub>O<sub>4</sub> nanoparticles (b), and Fe<sub>3</sub>O<sub>4</sub>@DHAQ\_GO

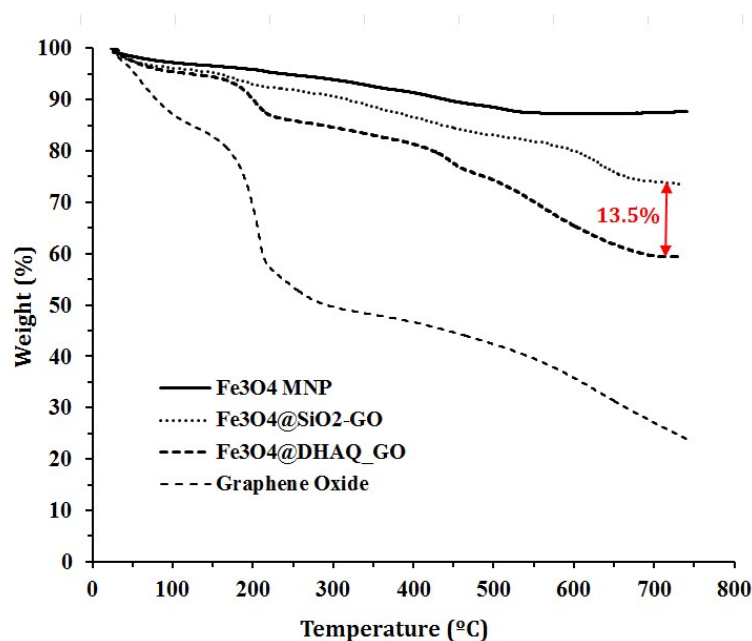

Figure S2. The TGA curves of Fe<sub>3</sub>O<sub>4</sub> magnetic nanoparticles, Fe<sub>3</sub>O<sub>4</sub>@SiO<sub>2</sub>-GO, Fe<sub>3</sub>O<sub>4</sub>@DHAQ\_GO, and graphene oxide.

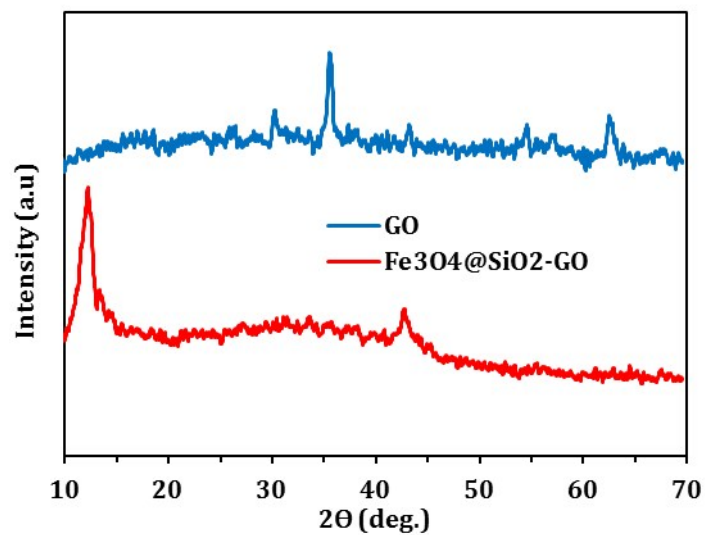

**Figure S3.** XRD patterns of GO (a) and  $\text{Fe}_3\text{O}_4@SiO_2\text{-GO}$  (b).

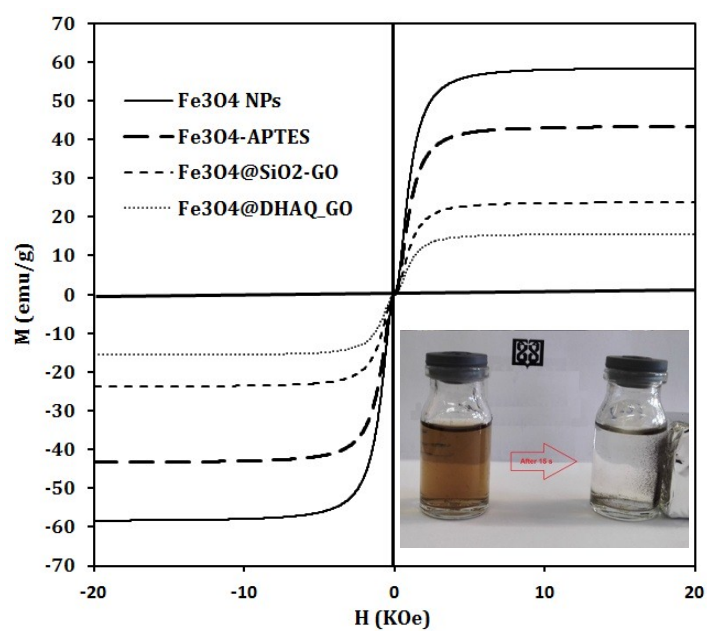

**Figure S4.** Hysteresis curves assigned to the  $\text{Fe}_3\text{O}_4$  NPs (a),  $\text{Fe}_3\text{O}_4\text{-APTES}$  (b),  $\text{GO}@SiO_2\text{-Fe}_3\text{O}_4$  (c), and  $\text{Fe}_3\text{O}_4@DHAQ\_GO$  nanocomposite (d).

**Table S1.** The kinetic models for the adsorption of Pb<sup>2+</sup> onto the Fe<sub>3</sub>O<sub>4</sub>@DHAQ\_GO nanocomposite (adsorbent dosage 55 mg L<sup>-1</sup>, pH 7).

| T<br>(K) | C <sub>0</sub><br>(mg/L) | Pseudo-First Order |                |                | Pseudo-Second Order |                |                |
|----------|--------------------------|--------------------|----------------|----------------|---------------------|----------------|----------------|
|          |                          | q <sub>e</sub>     | K <sub>1</sub> | R <sup>2</sup> | q <sub>e</sub>      | K <sub>2</sub> | R <sup>2</sup> |
| 278      | 2.5                      | 35.9               | 0.153          | 0.972          | 39.9                | 5.50           | 0.988          |
|          | 5                        | 72.8               | 0.052          | 0.968          | 87.6                | 0.63           | 0.969          |
|          | 10                       | 127.5              | 0.077          | 0.956          | 142.7               | 0.69           | 0.981          |
| 293      | 2.5                      | 38.9               | 0.114          | 0.829          | 42.4                | 4.43           | 0.891          |
|          | 5                        | 82.3               | 0.077          | 0.951          | 92.9                | 1.08           | 0.967          |
|          | 10                       | 134.5              | 0.085          | 0.829          | 149.7               | 0.76           | 0.903          |
| 308      | 2.5                      | 39.7               | 0.323          | 0.928          | 43.2                | 11.45          | 0.961          |
|          | 5                        | 85.1               | 0.092          | 0.961          | 94.4                | 1.34           | 0.978          |
|          | 10                       | 155.0              | 0.103          | 0.944          | 169.5               | 0.86           | 0.974          |
| 323      | 2.5                      | 41.2               | 0.695          | 0.948          | 44.1                | 22.04          | 0.965          |
|          | 5                        | 88.3               | 0.116          | 0.970          | 95.3                | 1.91           | 0.972          |
|          | 10                       | 161.3              | 0.157          | 0.973          | 174.3               | 1.30           | 0.987          |

**Table S2.** Ranking list of linear multiple regression models applied to describe the effect of main natural water ions on Pb<sup>2+</sup> removal by Akaike's Information Criterion (AIC).

| Model                                    | DF <sup>1</sup> | SS <sup>2</sup> | RSS <sup>3</sup> | AIC     | Rank |
|------------------------------------------|-----------------|-----------------|------------------|---------|------|
| Y <sup>*</sup> =f(x <sup>**</sup> )      | -               | -               | 290.69           | 86.131  | 1    |
| y=f(x)+f(F <sup>-</sup> )                | 1               | 9.741           | 280.95           | 87.109  | 2    |
| y=f(x)-f(NO <sub>3</sub> <sup>-</sup> )  | 1               | 36.322          | 327.01           | 87.664  | 3    |
| y=f(x)-f(K <sup>+</sup> )                | 1               | 42.758          | 333.44           | 88.248  | 4    |
| y=f(x)-f(Na <sup>+</sup> )               | 1               | 52.605          | 343.29           | 89.121  | 5    |
| y=f(x)-f(SO <sub>4</sub> <sup>2-</sup> ) | 1               | 113.585         | 404.27           | 94.027  | 6    |
| y=f(x)-f(HCO <sub>3</sub> <sup>-</sup> ) | 1               | 171.305         | 461.99           | 98.03   | 7    |
| y=f(x)-f(Cl <sup>-</sup> )               | 1               | 185.74          | 476.43           | 98.953  | 8    |
| y=f(x)-f(Mg <sup>2+</sup> )              | 1               | 210.069         | 500.76           | 100.448 | 9    |
| y=f(x)-f(Ca <sup>2+</sup> )              | 1               | 304.764         | 595.45           | 105.644 | 10   |

P-value (Shapiro-Wilk normality test for Pb(II) Removal (-log(C<sub>t</sub>/C<sub>0</sub>)) = **0.094**

1. Degree of Freedom

2. Sum of Squares

3. Residual Sum of Squares

\*y: Pb<sup>2+</sup> Removal (-log(C<sub>t</sub>/C<sub>0</sub>))

\*\*x: a×NO<sub>3</sub><sup>-</sup>+ b×K<sup>+</sup>+ c×Na<sup>+</sup>+ d×SO<sub>4</sub><sup>2-</sup>+ e×HCO<sub>3</sub><sup>-</sup>+ f×Cl<sup>-</sup>+ g×Mg<sup>2+</sup>+ h×Ca<sup>2+</sup>

Model coefficients: a, b, c..., h.

Ions concentration unit: mg/L
